17. Agewall S, Beltrame JF, Reynolds HR, Niessner A, Rosano G, Caforio AL, De Caterina R, Zimarino M, Roffi M, Kjeldsen K, Atar D, Kaski JC, Sechtem U, Tornvall P; WG on Cardiovascular Pharmacotherapy: ESC working group position paper on myocardial infarction with non-obstructive coronary arteries. *Eur Heart J* 2017; 38:143–53
18. Schulman-Marcus J, Feldman DN, Rao SV, Prasad A, McCoy L, Garratt K, Kim LK, Minutello RM, Wong SC, Vora AN, Singh HS, Wojdyla D, Mohsen A, Bergman G, Swaminathan RV: Characteristics of patients undergoing cardiac catheterization before noncardiac surgery: A report from the national cardiovascular data registry CathPCI Registry. *JAMA Intern Med* 2016; 176:611–8
19. Hanson I, Kahn J, Dixon S, Goldstein J: Angiographic and clinical characteristics of type 1 *versus* type 2 perioperative myocardial infarction. *Catheter Cardiovasc Interv* 2013; 82:622–8
20. Goyal A, Gluckman TJ, Tchong JE: What's in a name? The new ICD-10 (10<sup>th</sup> Revision of the International Statistical Classification of Diseases and Related Health Problems) codes and type 2 myocardial infarction. *Circulation* 2017; 136:1180–2
21. Nagele P: The case for a revised definition of myocardial infarction: Resolving the ambiguity of type 2 myocardial infarction. *JAMA Cardiol* 2016; 1:247–8
22. Alpert JS, Thygesen KA: The case for a revised definition of myocardial infarction: The ongoing conundrum of type 2 myocardial infarction *vs.* myocardial injury. *JAMA Cardiol* 2016; 1:249–50

## ANESTHESIOLOGY REFLECTIONS FROM THE WOOD LIBRARY-MUSEUM

### Gas, Ether, and Jingles from Dr. C. A. Smith of Oneida

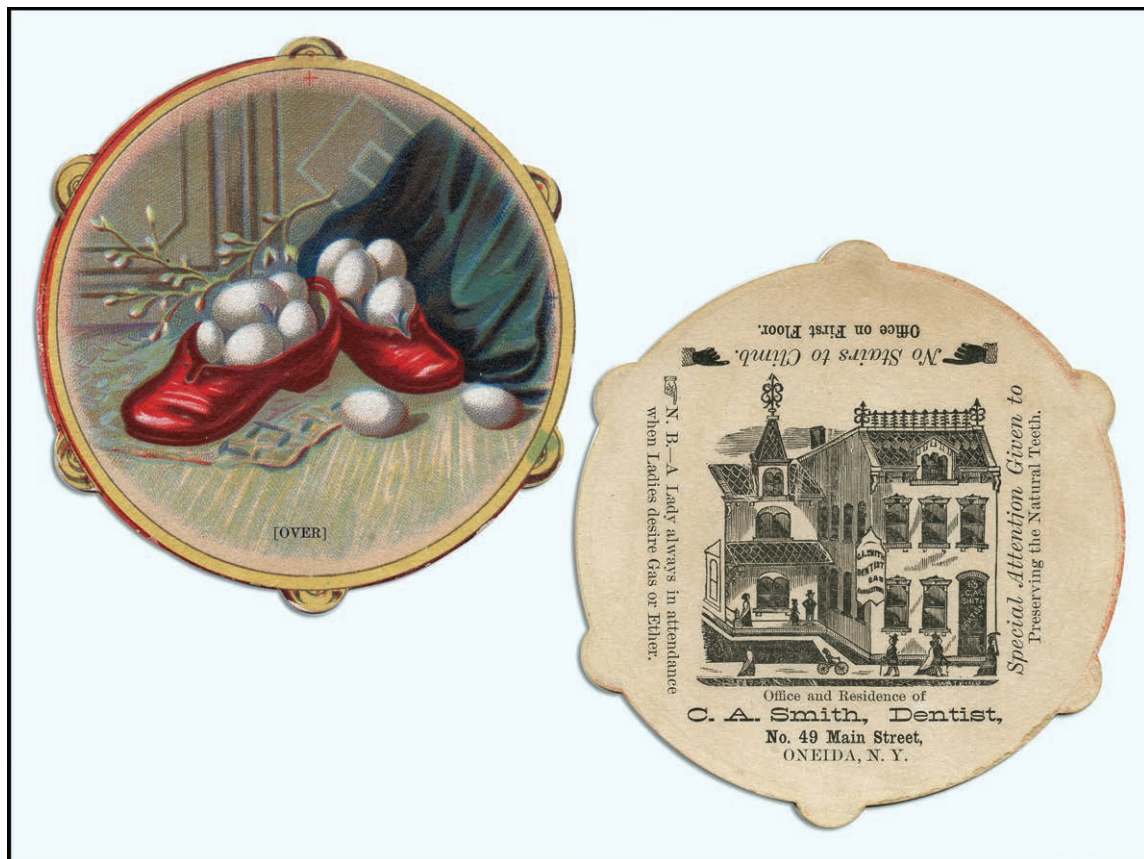

Die-cut in the shape of a tambourine with six pairs of jingles, the obverse (*left*) of this trade card distributed by Dr. C. A. Smith features two egg-filled shoes. Another classic from the Wood Library-Museum's Ben Z. Swanson Collection, the card's reverse (*right*) invites patients to Dr. Smith's dental office (and residence) on Main Street in Oneida, New York. Among his advertising jingles for Oneida residents, Dr. Smith advertised that there was a "Lady always in attendance when Ladies desire Gas or Ether." (Copyright © the American Society of Anesthesiologists' Wood Library-Museum of Anesthesiology.)

*George S. Bause, M.D., M.P.H., Honorary Curator and Laureate of the History of Anesthesia, Wood Library-Museum of Anesthesiology, Schaumburg, Illinois, and Clinical Associate Professor, Case Western Reserve University, Cleveland, Ohio. UJYC@aol.com.*
